# Supplementary material
Source: MDPI journal article supplement (https://www.mdpi.com/2079-6412/10/1/12)
Supplement: s1 [file s1]

**Table S1.** The comparison of the compositions of vitronectin and fibronectin with respect to BSA obtained by the conventional methods, which incorporates pipetting processes, and our method.

|            | <b>Vitronectin<br/>(mol/mol)</b> | <b>Fibronectin<br/>(mol/mol)</b> |
|------------|----------------------------------|----------------------------------|
| Pipetting  | 0.143                            | 0.191                            |
| Our method | 0.842                            | 0.855                            |

**Table S2.** Ratio between the number of theoretical m/z values and the number of peaks observed (experimental/theoretical).

| <b>SAM</b> | <b>Matching Ratio</b>                          |                                                |
|------------|------------------------------------------------|------------------------------------------------|
|            | <b>Vitronectin<br/>(Number of Matches /21)</b> | <b>Fibronectin<br/>(Number of Matches/128)</b> |
| C8         | 0.41                                           | 0.35                                           |
| OH         | 0.30                                           | 0.22                                           |
| COOH       | 0.60                                           | 0.51                                           |
| NH2        | 0.27                                           | 0.31                                           |
| EG3        | 0.18                                           | 0.23                                           |
